# Supplementary material for: Amino N-oxide functionalized graphene quantum dots as a cathode interlayer for inverted polymer solar cells
Source: Royal Society of Chemistry journal article supplement (doi:10.1039/c8tc01016a), 2018-01-01
Supplement: c8tc01016a1.pdf [file c8tc01016a1.pdf]

## Supporting Information

### Amino N-Oxide Functionalized Graphene Quantum Dots as Cathode Interlayer for the Inverted Polymer Solar Cells

Lu Zhang,<sup>†</sup> Han Xu,<sup>†,‡</sup> Zicheng Ding,<sup>†</sup> Junli Hu,<sup>\*,‡</sup> Jun Liu,<sup>\*,†</sup> Yichun Liu<sup>\*,‡</sup>

<sup>†</sup>State Key Laboratory of Polymer Physics and Chemistry, Changchun Institute of Applied Chemistry, Chinese Academy of Sciences, Changchun 130022, P. R. China. \*Email: liujun@ciac.ac.cn

<sup>‡</sup>Key Laboratory of UV-Emitting Materials and Technology (Northeast Normal University), Ministry of Education, Changchun 130024, P. R. China. \*Email: hujl100@nenu.edu.cn; ycliu@nenu.edu.cn

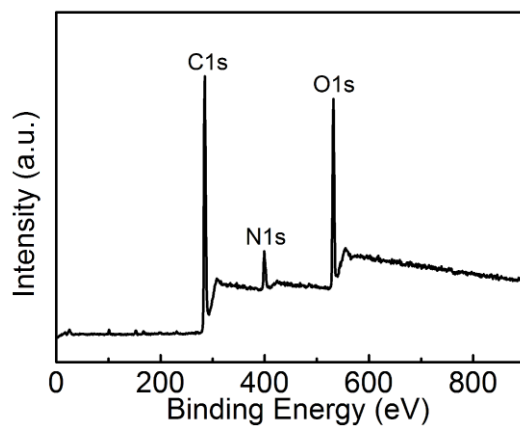

**Figure S1** XPS survey spectrum of GQD-NO.

**Table S1.** The component analysis of GQD-N and GQD-NO by XPS.

| Materials | C (at%) | O (at%) | N (at%) |
|-----------|---------|---------|---------|
| GQD-N     | 66.98   | 25.34   | 7.68    |
| GQD-NO    | 65.26   | 26.58   | 8.16    |

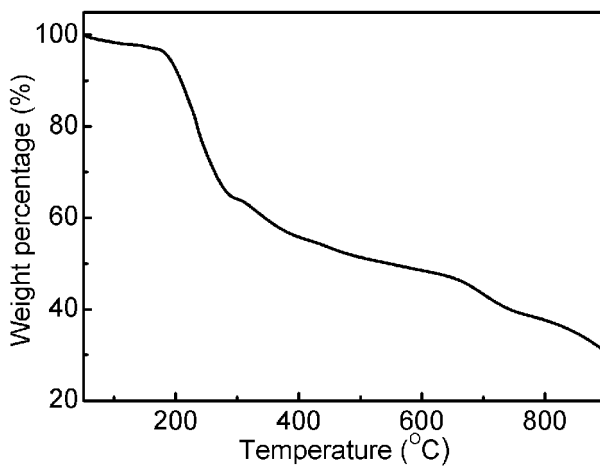

**Figure S2** TGA curve of GQD-NO under nitrogen. TGA analysis shows that the decomposition temperature (Td) of GQD-NO at 5% weight loss is 188°C.

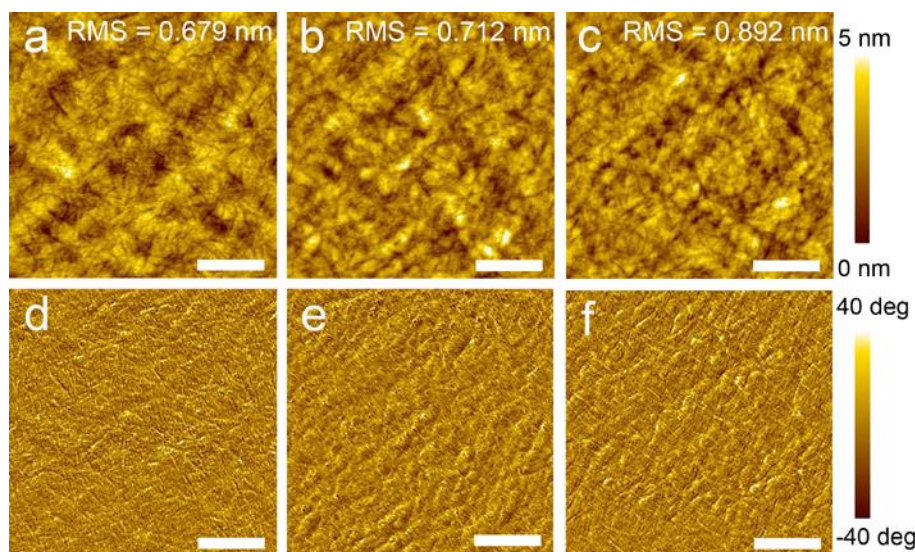

**Figure S3** AFM height images of the PCDTBT:PC<sub>71</sub>BM active layer on ITO (a), ITO/ZnO (b) and ITO/GQD-NO (c) substrates. AFM phase images of the PCDTBT:PC<sub>71</sub>BM active layer on ITO (d), ITO/ZnO (e) and ITO/GQD-NO (f) substrates. The scale bar is 500 nm.

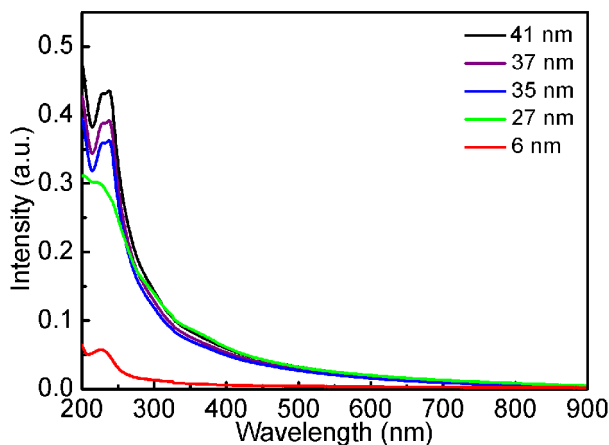

**Figure S4** UV/Vis absorption spectra of GQD-NO interlayers with different thicknesses on quartz plates. The thicknesses of four thick GQD-NO films on quartz substrates are measured by profilometer. We fit linear to get a function relation between the thickness and the corresponding absorbance at 230 nm according to the Lambert-Beer law. The thickness of GQD-NO interlayer in the same condition as device fabrication is then calculated to be 6 nm using the function relation.

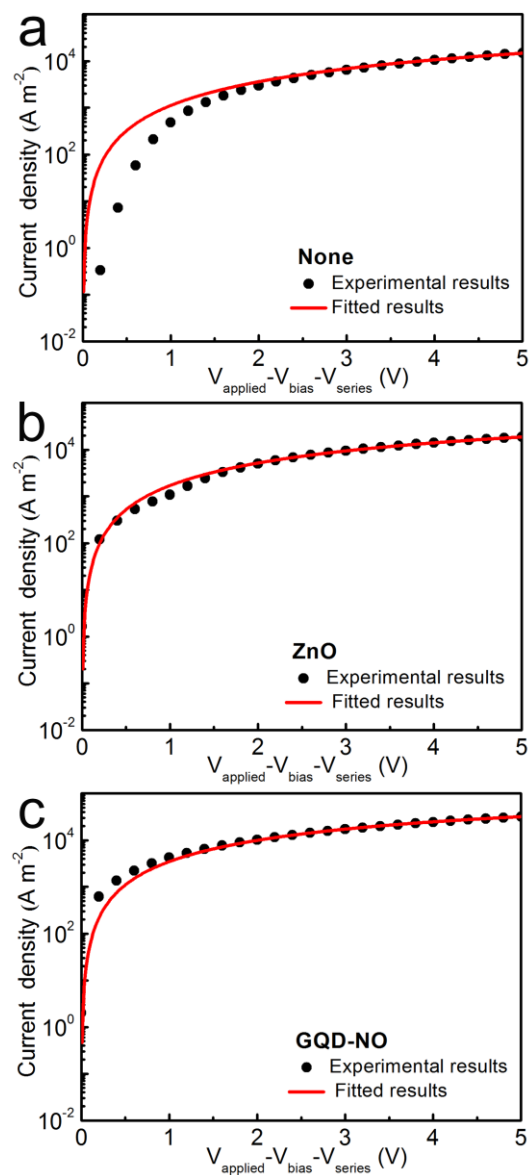

**Figure S5** SCLC fittings of the electron-only devices based on PCDTBT:PC<sub>71</sub>BM active layer with none (a), ZnO (b) and GQD-NO (c) as CILs.

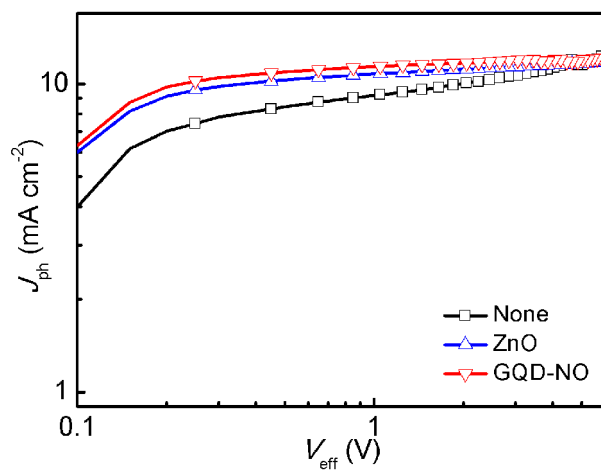

**Figure S6** Photocurrent versus effective voltage plots of the PCDTBT:PC<sub>71</sub>BM based PSC devices with different CILs. The charge-transfer state (CTS) dissociation efficiency of the PSC device without cathode interlayer is 72.8%, which indicates the inefficient exciton dissociation or charge transfer process at the cathode interface. The CTS dissociation efficiency of the device with GQD-NO as CILs (93.8%) is very comparable to that with the state-of-the-art CILs, ZnO (91.6%), illustrating that the GQD-NO CILs may effectively prevents charge recombination at the cathode interface.
